# Supplementary material
Source: Springer Nature journal article supplement (https://www.springermedizin.de/resource/supplementary/12883_2009_335_MOESM1_ESM.pdf/9455176)

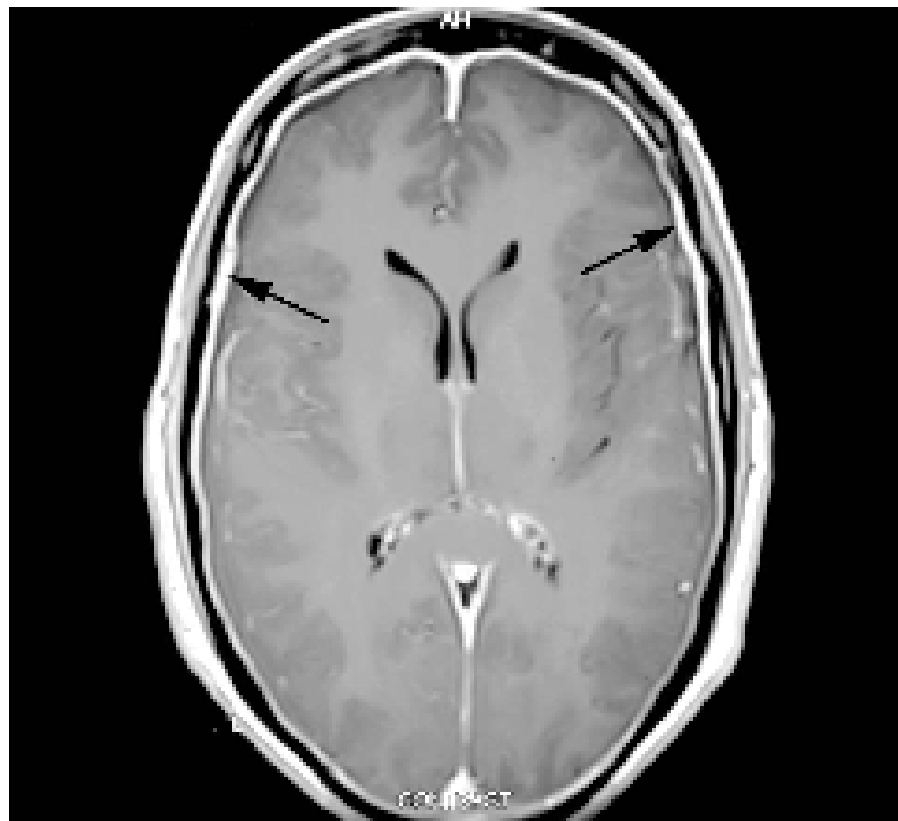

A

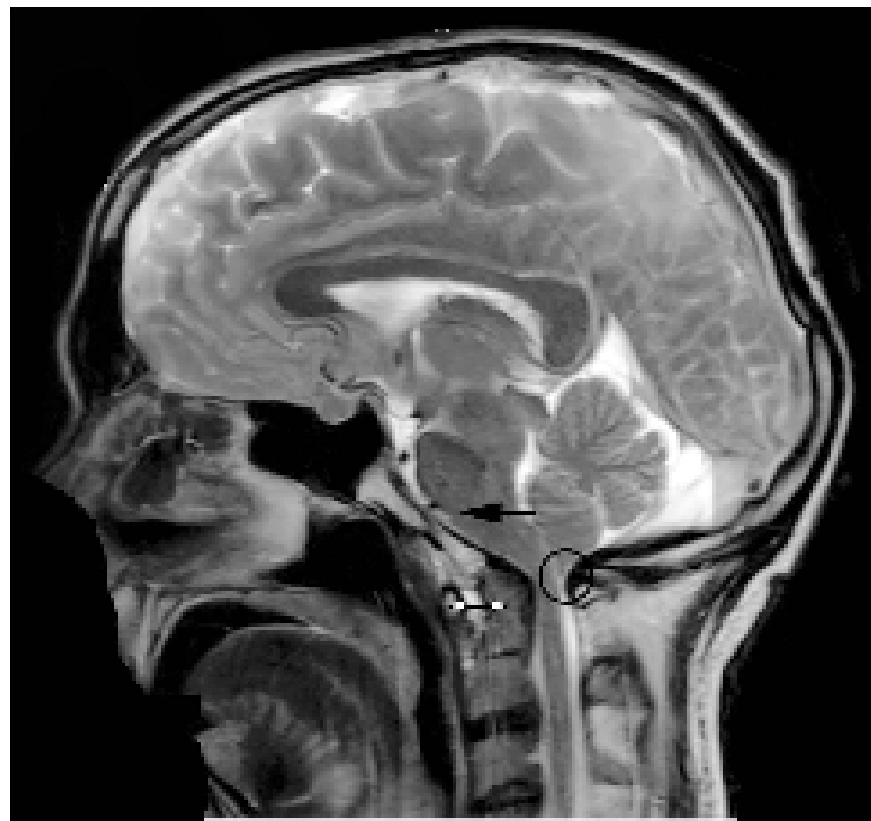

B

Supplement: MOESM1 [file 9455176]
